# Supplementary material for: Research on the structural characteristics of a novel Chinese Iron Yam polysaccharide and its gastroprotection mechanism against ethanol-induced gastric mucosal lesion in a BALB/c mouse model
Source: Royal Society of Chemistry journal article supplement (doi:10.1039/c9fo02642h), 2020-01-01
Supplement: c9fo02642h1.pdf [file c9fo02642h1.pdf]

## S1 The digestion of CIYP in simulated gastric juice

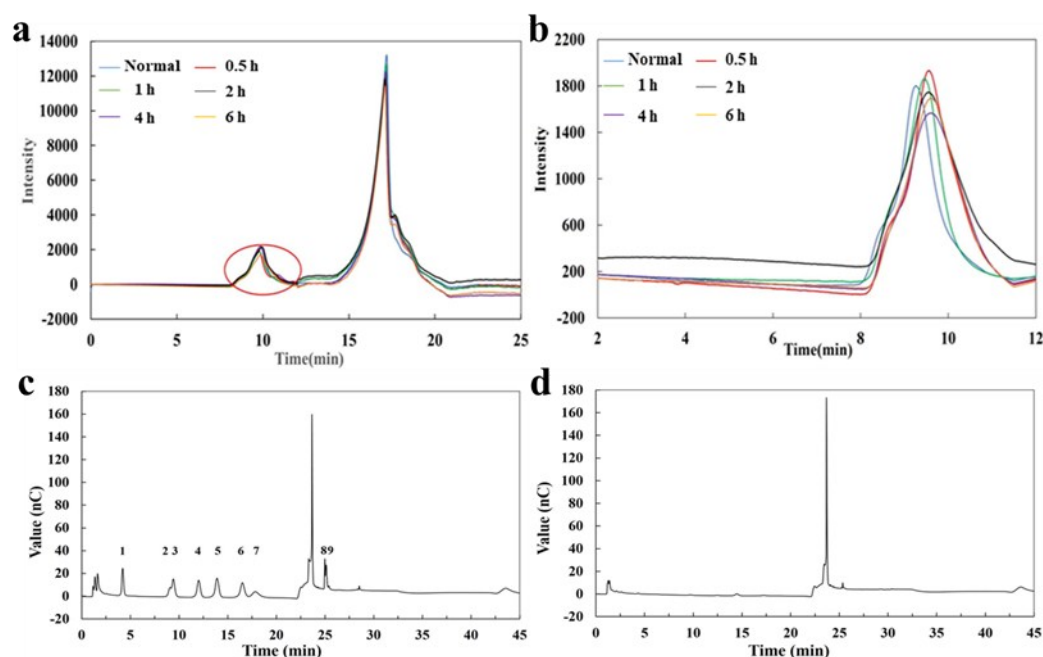

Fig. S1: The digestion product of CIYP in simulated gastric juice; b: Locally enlarged liquid phase diagram; c: Ion chromatography of monosaccharide mixed standard solution (1- fucose, 2- rhamnose, 3- arabinose, 4- galactose, 5- glucose, 6- xylose, 7- mannose, 8- galacturonic acid, 9- glucuronic acid); d: Ion chromatography of digested CIYP from simulated digested liquid in vitro.

**Table S1**

**Molecular weight change of CIYP after digestion in vitro**

| Group  | Retention time (min) | $M_w$ (kDa) |
|--------|----------------------|-------------|
| Normal | 9.22                 | 1870±3.16   |
| 0.5 h  | 9.40                 | 1857±2.29   |
| 1 h    | 9.58                 | 1848±3.28   |
| 2 h    | 9.61                 | 1847±4.01   |
| 4 h    | 9.63                 | 1844±2.03   |
| 6 h    | 9.66                 | 1842±4.13   |
